# Supplementary material for: Academic Achievement in Primary School in Offspring Born to Mothers With Type 1 Diabetes (the EPICOM Study): A Register-Based Prospective Cohort Study
Source: Oxford University Press journal article supplement (doi:10.2337/dc15-0223), 2015-06-12
Supplement: dc150223supplementarydata.pdf [file dc150223supplementarydata.pdf]

## SUPPLEMENTARY DATA

**Supplementary Table 1.** Difference in average school grades between index children and their matched controls, by maternal HbA<sub>1c</sub> level.

| Pregestational HbA <sub>1c</sub> |                      | 1 <sup>st</sup> trimester HbA <sub>1c</sub> |                      | 3 <sup>rd</sup> trimester HbA <sub>1c</sub> |                      |
|----------------------------------|----------------------|---------------------------------------------|----------------------|---------------------------------------------|----------------------|
| HbA <sub>1c</sub> % [mmol/mol]   | β (95% CI)           | HbA <sub>1c</sub> % [mmol/mol]              | β (95% CI)           | HbA <sub>1c</sub> % [mmol/mol]              | β (95% CI)           |
| <7.0 [53]                        | 0.22 (-0.11, 0.56)   | <6.5 [48]                                   | 0.28 (-0.08, 0.64)   | <5.6 [38]                                   | 0.52 (0.09, 0.96)    |
| 7.0-7.7 [53-61]                  | 0.28 (-0.14, 0.69)   | 6.5-7.3 [48-56]                             | 0.13 (-0.20, 0.46)   | 5.6-6.6 [38-49]                             | -0.002 (-0.27, 0.27) |
| 7.8-8.8 [62-73]                  | -0.28 (-0.68, 0.13)  | 7.4-8.3 [57-67]                             | -0.04 (-0.39, 0.31)  | 6.7-7.4 [50-57]                             | -0.12 (-0.49, 0.25)  |
| >8.8 [73]                        | -0.42 (-0.79, -0.04) | >8.3 [67]                                   | -0.65 (-0.99, -0.31) | >7.4 [57]                                   | -0.58 (-0.92, -0.23) |

β-values are regression coefficients representing the mean difference in grades between index children and their matched controls, adjusted for gender, maternal age at birth, original grading scale and parental educational status. Confidence intervals are calculated with robust standard errors. Grouping according to maternal HbA<sub>1c</sub> level are generated using the recommended levels and quartiles dependent on the numbers of mothers with accessible HbA<sub>1c</sub>.

# SUPPLEMENTARY DATA

**Supplementary Table 2.** HbA<sub>1c</sub> distribution by parental educational status for the index children.

| <b>Pregestational HbA<sub>1c</sub></b> |                                |                                                       |                              |             |
|----------------------------------------|--------------------------------|-------------------------------------------------------|------------------------------|-------------|
| HbA <sub>1c</sub> %<br>[mmol/mol]      | Primary or<br>secondary school | Vocational training, short-<br>cycle higher education | Bachelor degree<br>or higher | Total       |
| <7.0 [53]                              | 12 (30.8%)                     | 70 (26.5%)                                            | 64 (37.2%)                   | 146 (30.7%) |
| 7.0-7.7 [53-61]                        | 3 (7.7%)                       | 56 (21.2%)                                            | 46 (26.7%)                   | 105 (22.1%) |
| 7.8-8.8 [62-73]                        | 9 (23.1%)                      | 54 (20.5%)                                            | 39 (22.7%)                   | 102 (21.5%) |
| >8.8 [73]                              | 15 (38.5%)                     | 84 (31.8%)                                            | 23 (13.4%)                   | 122 (25.7%) |
| Total                                  | 39 (100%)                      | 264 (100%)                                            | 172 (100%)                   | 475 (100 %) |

  

| <b>1<sup>st</sup> trimester HbA<sub>1c</sub></b> |                                |                                                       |                              |             |
|--------------------------------------------------|--------------------------------|-------------------------------------------------------|------------------------------|-------------|
| HbA <sub>1c</sub> %<br>[mmol/mol]                | Primary or<br>secondary school | Vocational training, short-<br>cycle higher education | Bachelor degree<br>or higher | Total       |
| <6.5 [48]                                        | 10 (19.2%)                     | 68 (21.1%)                                            | 54 (27.3%)                   | 132 (23.0%) |
| 6.5-7.3 [48-56]                                  | 14 (26.9%)                     | 85 (26.3%)                                            | 62 (31.3%)                   | 161 (28.1%) |
| 7.4-8.3 [57-67]                                  | 8 (15.4%)                      | 75 (23.2%)                                            | 49 (24.6%)                   | 132 (23.0%) |
| >8.3 [67]                                        | 20 (38.5%)                     | 95 (29.4%)                                            | 33 (16.7%)                   | 148 (25.8%) |
| Total                                            | 52 (100%)                      | 323 (100%)                                            | 198 (100%)                   | 573 (100%)  |

  

| <b>3<sup>rd</sup> trimester HbA<sub>1c</sub></b> |                                |                                                       |                              |             |
|--------------------------------------------------|--------------------------------|-------------------------------------------------------|------------------------------|-------------|
| HbA <sub>1c</sub> %<br>[mmol/mol]                | Primary or<br>secondary school | Vocational training, short-<br>cycle higher education | Bachelor degree<br>or higher | Total       |
| <5.6 [38]                                        | 4 (7.4%)                       | 35 (10.6%)                                            | 31 (15.7%)                   | 70 (12.0%)  |
| 5.6-6.6 [38-49]                                  | 18 (33.3%)                     | 114 (34.7%)                                           | 91 (46.0%)                   | 223 (38.4%) |
| 6.7-7.4 [50-57]                                  | 10 (18.5%)                     | 79 (24.0%)                                            | 49 (24.7%)                   | 138 (23.8%) |
| >7.4 [57]                                        | 22 (40.7%)                     | 101 (30.7%)                                           | 27 (13.6%)                   | 150 (25.8%) |
| Total                                            | 54 (100%)                      | 329 (100%)                                            | 198 (100%)                   | 581 (100%)  |

Test for trend: Pregestational HbA<sub>1c</sub>: P<0.001, 1<sup>st</sup> trimester HbA<sub>1c</sub>: P=0.001, 3<sup>rd</sup> trimester HbA<sub>1c</sub>: P<0.001
